# Supplementary material for: Synaptic polarity and sign-balance prediction using gene expression data in the Caenorhabditis elegans chemical synapse neuronal connectome network
Source: PubMed Central journal article supplement (PMC7785220; doi:10.1371/journal.pcbi.1007974), 2020-12-21

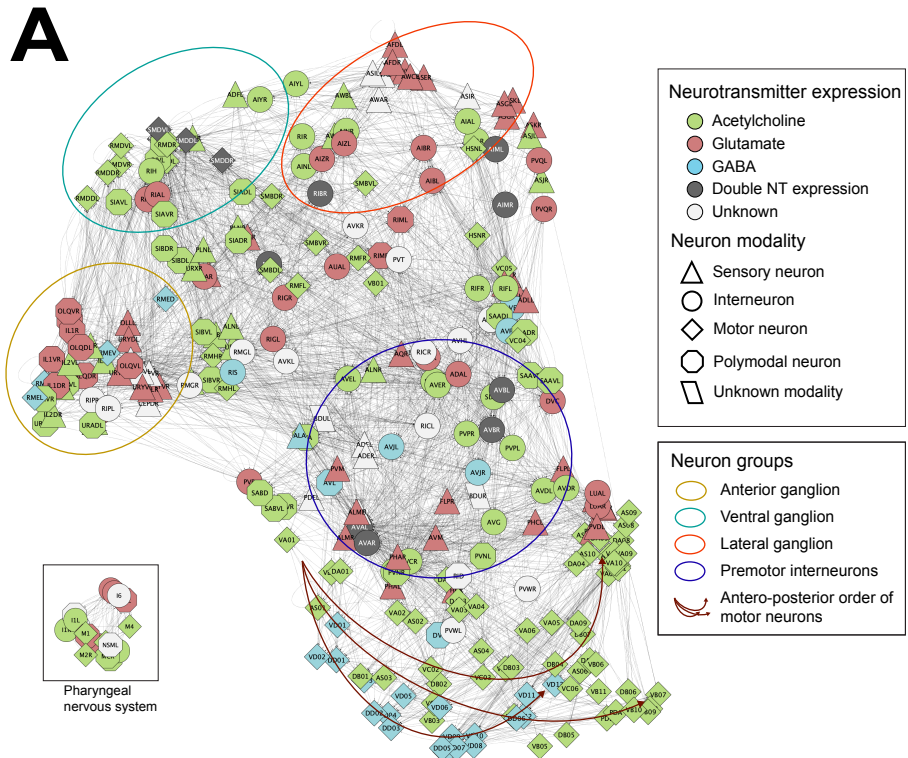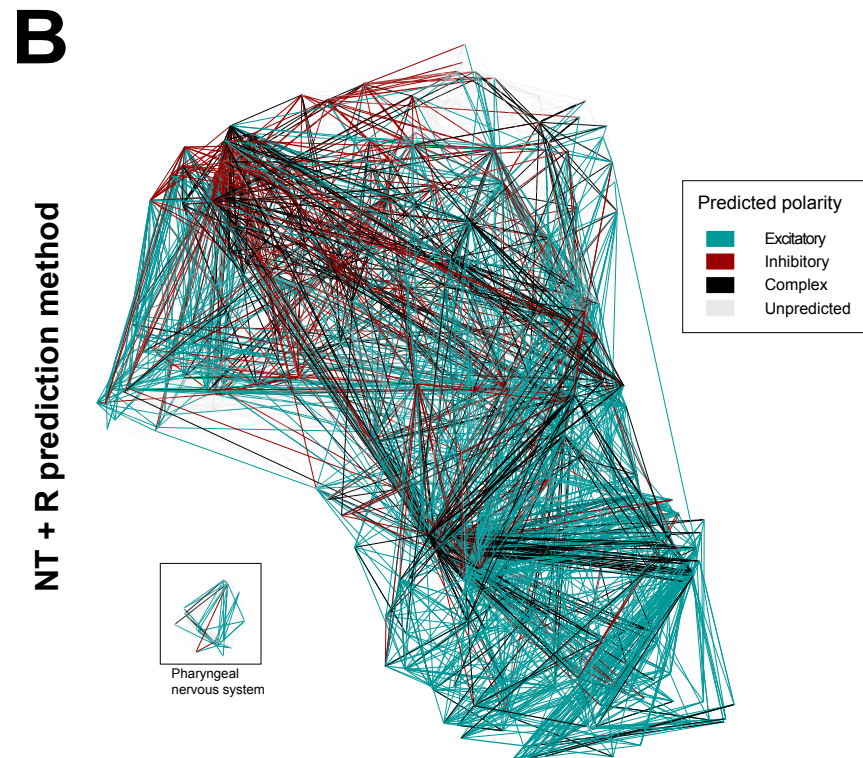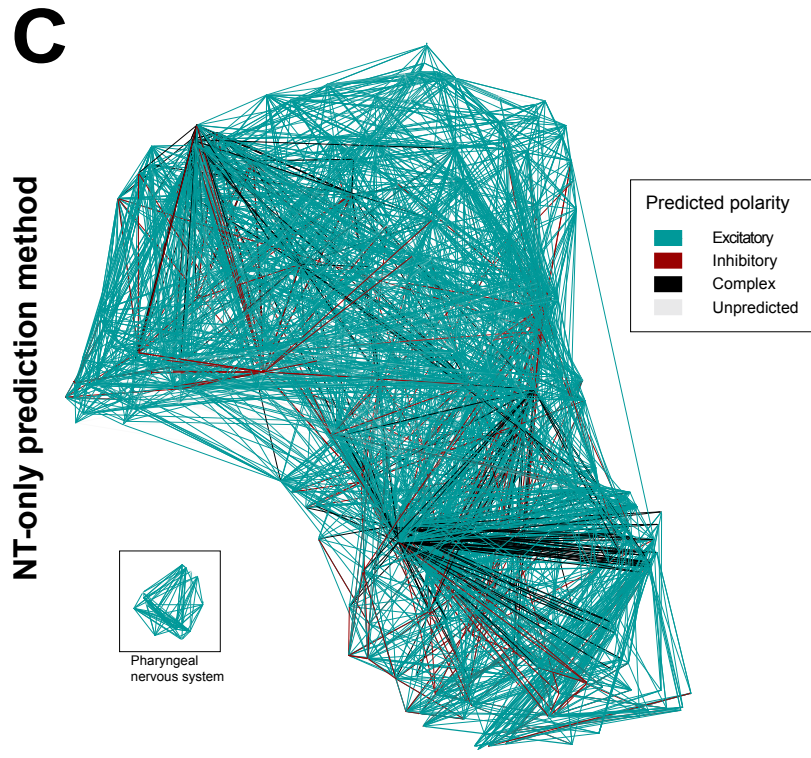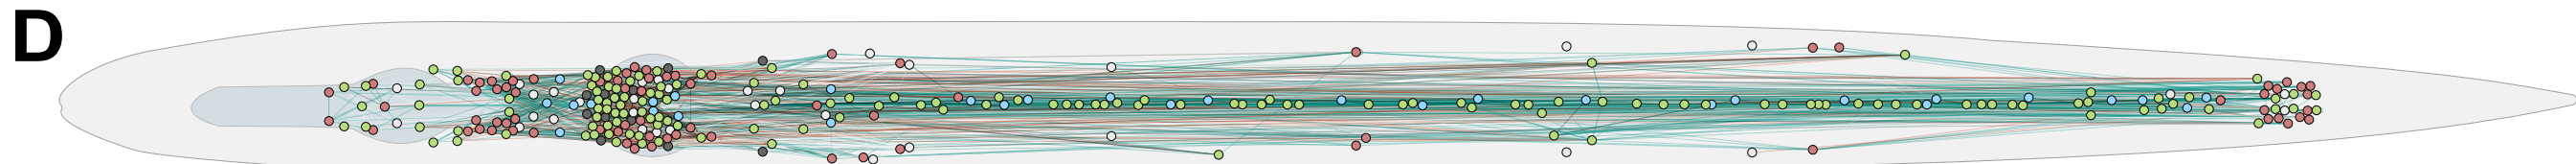

Supplement: pcbi.1007974.s010.pdf [file pcbi.1007974.s010.pdf]
